# Supplementary material for: Translation, adaptation, validation and performance of the American Weight Efficacy Lifestyle Questionnaire Short Form (WEL-SF) to a Norwegian version: a cross-sectional study
Source: PeerJ. 2014 Sep 16;2:e565. doi: 10.7717/peerj.565 (PMC4178457; doi:10.7717/peerj.565)
Supplement: Supplemental Information 2 [file peerj-02-565-s002.xlsx]

## Sheet: Data
BaseAfter	Gender	Age	Education	Maritalstatus	PreBMI	PostBMI	DeltaBMI	Diabetes	Hypertension	Psych	MSpain	WEL1	WEL2	WEL3	WEL4	WEL5	WEL6	WEL7	WEL8	sumWEL	GSE	SEPA	PCS	MCS	IWQOL_Total
1	2	67	3	4	45.3	45.3	0	1	2	1	2	7	9	10	9	9	10	9	9	72	31	77	26.3434	34.3066	23.8182
1	1	38	2	3	53	53	0	1	2	1	1	5	5	5	3	0	1	0	0	19	10	27	33.6294	32.6438	86.8831
1	2	55	3	4	34.5	34.5	0	2	1	1	1	8	7	8	7	8	10	8	10	66	29	57	37.505	46.7158	71.3896
1	2	45	2	3	43.8	43.8	0	1	1	1	1	7	9	5	5	10	3	7	3	49	32	62	44.8448	43.7801	72.5455
1	1	37	1	2	40.1	40.1	0	1	1	1	1	8	8	10	5	10	8	10	10	69	36	60	46.1929	42.6277	81.987
1	1	56	2	1	42.4	42.4	0	1	2	1	1	10	10	10	10	10	10	10	10	80	35	69	29.316	41.0047	87.1169
1	2	45	1	1	44.1	44.1	0	1	1	1	2	8	8	10	7	7	8	8	7	63	28	64	52.9089	55.7698	81.0649
1	1	37	4	2	41.4	41.4	0	2	2	1	1	2	2	2	7	2	9	9	9	42	31	61	45.0608	26.0547	75.8084
1	1	59	2	3	38.8	38.8	0	1	2	1	1	7	7	6	6	5	7	6	7	51	29	52	40.2808	44.1935	72.4838
1	2	19	1	1	44.2	44.2	0	1	2	2	1	8	8	10	8	8	5	10	5	62	29	77	43.5073	46.6997	70.0455
1	1	54	1	3	34.8	34.8	0	2	2	1	1	7	7	8	10	7	6	8	7	60	35	69	53.6256	56.8333	86.5909
1	1	37	3	3	49.6	49.6	0	1	1	1	1	10	8	9	6	9	6	8	10	66	35	66	45.6457	51.5641	63.3117
1	2	33	2	3	45.7	45.7	0	1	1	1	1	8	7	8	4	8	4	8	5	52	34	35	43.8703	49.0102	76.5065
1	1	61	2	3	35	35	0	2	2	1	1	8	8	9	9	8	7	8	8	65	31	56	44.3435	52.479	84.0974
1	2	37	2	1	46.7	46.7	0	1	1	1	1	10	5	10	6	9	9	10	10	69	32	67	44.6416	56.287	66.987
1	1	63	2	3	37.6	37.6	0	2	2	1	1	8	8	6	8	8	8	8	8	62	32	51	56.308	61.3567	87.3929
1	2	53	2	3	41.9	41.9	0	1	2	1	2	10	7	9	7	4	5	5	10	57	31	61	40.7089	46.6278	59.3052
1	2	41	3	4	39.6	39.6	0	1	1	1	2	9	3	3	9	7	9	9	10	59	39	72	37.7678	49.8208	45.8636
1	1	39	1	2	36.1	36.1	0	2	2	1	1	10	9	8	8	10	10	10	10	75	39	62	53.2764	52.8308	76.7825
1	2	26	2	2	44.6	44.6	0	1	1	1	2	10	9	9	5	8	9	8	10	68	31	47	46.1956	56.8435	76.289
1	1	34	2	1	50.6	50.6	0	1	1	1	1	10	8	8	8	10	8	10	10	72	34	55	45.538	51.1367	81.224
1	2	59	2	3	44.1	44.1	0	1	1	2	1	8	2	8	4	2	1	8	8	41	33	51	47.257	58.2183	68.9448
1	2	31	2	3	45.9	45.9	0	1	2	1	1	5	6	8	5	5	3	4	4	40	28	48	42.8124	39.0314	45.2987
1	2	50	2	1	39.1	39.1	0	1	1	1	1	5	7	9	7	4	8	4	8	52	31	42	42.3515	38.6781	57.1851
1	2	37	3	1	51.6	51.6	0	1	1	2	1	8	9	7	7	9	9	9	8	66	32	72	35.8318	44.069	44.6688
1	2	45	2	1	40.8	40.8	0	1	1	1	2	9	9	10	9	9	9	9	9	73	36	59	49.9976	49.6457	55.2078
1	2	51	2	2	44.7	44.7	0	1	1	1	2	10	3	8	4	7	5	5	4	46	32	57	26.6587	44.6261	71.7857
1	1	45	4	4	45.7	45.7	0	1	2	1	1	4	9	7	9	7	9	10	9	64	34	48	35.5803	46.6094	53.276
1	1	29	2	1	38.9	38.9	0	1	1	1	2	5	5	5	5	5	4	6	7	42	28	38	46.9674	38.7983	60.1591
1	2	27	2	4	37.4	37.4	0	1	1	1	1	5	5	8	5	8	5	9	10	55	30	63	49.0961	45.6354	70.8409
1	1	62	3	2	40.8	40.8	0	2	2	1	1	5	5	5	7	5	5	8	9	49	30	53	29.6367	36.957	48.1558
1	2	34	1	1	33.5	33.5	0	1	1	2	2	8	8	8	8	8	10	8	5	63	29	58	33.1558	29.2412	38.974
1	2	59	1	3	40.2	40.2	0	1	2	1	1	5	4	7	9	4	4	8	10	51	32	52	40.1482	54.0053	57.4838
1	2	46	2	2	47	47	0	1	1	1	1	4	2	3	3	1	2	3	5	23	24	23	22.1975	46.6435	28.3247
1	1	53	2	3	36.2	36.2	0	1	1	1	2	10	9	10	9	10	9	10	10	77	34	40	45.5412	53.5863	74.75
1	2	40	3	4	41.3	41.3	0	2	1	2	1	9	8	8	9	7	8	8	9	66	30	64	39.7038	34.6605	53.7955
1	2	41	2	3	50.7	50.7	0	1	2	1	2	8	6	8	6	8	5	8	10	59	29	45	45.7056	52.5056	64.8896
1	2	47	2	3	30.1	30.1	0	1	2	1	1	9	4	9	4	6	5	8	4	49	34	56	41.5781	52.3044	76.3766
1	1	60	2	4	44.4	44.4	0	2	2	2	2	3	1	4	1	1	3	4	8	25	21	27	33.4554	44.5573	43.75
1	1	41	2	1	53.5	53.5	0	2	1	1	2	7	6	8	6	9	7	9	9	61	34	65	27.5902	42.6824	52.1104
1	2	54	2	3	40.1	40.1	0	2	2	1	2	8	9	8	6	7	8	7	8	61	32	51	26.1866	42.7643	33.974
1	1	27	2	2	45.4	45.4	0	1	1	1	1	6	9	10	10	8	5	8	10	66	27	65	39.4937	42.4248	57.7825
1	2	36	1	1	45.4	45.4	0	1	1	1	1	5	3	10	5	4	10	5	10	52	28	28	44.3248	37.0342	47.7045
1	1	49	2	1	44	44	0	1	1	1	2	4	3	7	4	4	8	7	8	45	27	48	36.8655	35.5866	43.3214
1	1	36	2	3	38.4	38.4	0	1	1	1	1	4	7	7	10	4	4	7	7	50	28	47	38.5913	54.1807	54.5747
1	2	50	2	3	38.6	38.6	0	1	2	1	2	8	2	8	3	3	9	6	6	45	36	78	31.2316	54.9171	44.9903
1	1	62	2	2	45.4	45.4	0	2	1	1	1	10	10	10	10	10	8	10	10	78	27	40	28.4842	47.9679	56.4188
1	2	43	1	3	38.4	38.4	0	1	1	2	2	1	2	10	5	1	5	5	4	33	32	53	47.4114	29.2439	44.8604
1	1	24	3	1	48.2	48.2	0	1	1	2	2	5	3	2	7	3	8	1	10	39	37	45	30.6431	27.4817	47.3247
1	2	43	2	4	45	45	0	1	2	1	1	6	2	4	2	2	3	2	2	23	27	42	28.4477	32.9508	40.2305
1	2	34	2	1	44.8	44.8	0	1	1	1	1	10	5	7	5	9	6	5	9	56	28	54	41.7057	52.5248	62.3117
1	1	31	1	3	39.9	39.9	0	1	2	2	2	10	10	9	9	2	4	9	10	63	25	42	30.1952	23.9703	67.0844
1	2	50	2	4	42.5	42.5	0	1	1	2	1	8	8	9	9	8	10	8	9	69	28	64	31.8825	55.3329	58.2727
1	1	51	3	3	37.1	37.1	0	1	1	1	1	6	4	4	4	6	6	6	6	42	30	49	50.8686	30.7564	45.1526
1	2	24	3	1	42	42	0	1	2	1	1	10	8	10	8	9	10	9	10	74	29	59	25.2252	48.2136	30.6364
1	2	38	2	1	36.3	36.3	0	1	1	2	2	6	5	8	5	10	10	8	10	62	23	60	51.495	30.9346	37.6818
1	2	50	3	3	36.1	36.1	0	2	1	1	2	9	8	4	8	5	8	4	4	50	25	47	37.3549	26.4368	54.0292
1	2	21	2	2	50.5	50.5	0	1	1	1	2	7	6	9	8	5	8	7	7	57	28	55	46.5782	51.4137	50.1234
1	1	34	2	3	45.9	45.9	0	1	1	2	1	6	7	6	5	6	9	7	9	55	23	36	48.1844	30.162	57.7955
1	2	48	2	3	50.5	50.5	0	1	1	2	2	6	4	4	4	1	4	8	10	41	29	42	39.535	45.5977	20.6688
1	2	41	3	1	41	41	0	1	1	1	2	3	2	3	2	2	8	3	0	23	30	56	45.051	37.4743	35.3149
1	1	57	2	3	43.1	43.1	0	1	2	1	2	8	8	8	6	2	8	3	9	52	38	67	22.5122	53.3935	63.5649
1	2	43	2	3	43.2	43.2	0	1	1	1	2	9	6	9	9	8	9	8	9	67	28	54	46.738	49.7894	64.0227
1	2	27	2	2	41.2	41.2	0	2	1	1	1	9	4	9	4	2	4	5	10	47	27	59	36.6109	42.4967	43.4253
1	1	41	2	1	40.2	40.2	0	2	1	1	2	8	6	9	6	8	9	8	9	63	28	55	22.6018	35.7322	54.6851
1	2	59	1	3	40.7	40.7	0	1	1	1	2	4	5	8	5	3	5	4	10	44	32	46	40.2618	36.782	46.75
1	2	20	2	1	40.3	40.3	0	1	1	1	1	10	6	8	4	5	10	3	2	48	28	43	40.9758	33.4136	45.9026
1	1	30	4	3	42.3	42.3	0	1	1	1	1	2	2	2	2	2	2	2	2	16	38	38	46.5064	36.5561	50.1591
1	2	59	1	3	42.2	42.2	0	1	1	1	2	10	8	10	10	10	8	10	10	76	36	76	50.1855	59.3834	58.3636
1	1	51	2	2	41.3	41.3	0	1	1	1	1	8	5	10	5	5	10	5	10	58	32	73	50.9255	49.3333	42.4416
1	2	53	2	1	51.9	51.9	0	2	2	2	1	8	6	10	6	4	10	4	6	54	35	53	29.4712	36.806	35.5974
1	2	38	3	3	47.8	47.8	0	1	1	1	1	7	3	5	5	8	8	4	10	50	30	70	39.3513	49.2115	65.1169
1	2	56	1	2	40.5	40.5	0	1	1	1	2	7	7	8	6	6	9	9	10	62	20	50	21.8504	29.6444	47.8506
1	2	56	4	3	38.6	38.6	0	2	2	1	2	5	4	8	5	6	3	8	4	43	33	56	37.6303	29.3445	50.2273
1	2	56	2	3	39.4	39.4	0	2	2	1	1	5	7	7	7	6	10	10	10	62	38	74	35.0272	23.8514	44.7857
1	2	47	1	3	42	42	0	2	1	1	1	1	10	3	10	10	10	3	10	57	30	26	40.2714	27.3212	57.7273
1	2	34	2	1	43.7	43.7	0	1	1	2	1	7	8	8	8	7	9	7	9	63	32	65	26.9199	55.2562	32.6753
1	1	40	2	3	39.9	39.9	0	1	1	1	1	8	5	9	2	4	9	9	10	56	27	39	31.3959	42.8567	60.6786
1	1	38	2	3	41.7	41.7	0	1	1	2	1	3	3	6	6	2	7	6	8	41	27	48	38.4888	39.6745	45.9448
1	2	28	2	2	56.7	56.7	0	2	2	2	1	5	3	8	8	3	3	8	8	46	28	47	35.0005	45.2851	34.4188
1	2	36	3	1	43.9	43.9	0	1	1	1	1	2	7	6	5	2	10	8	10	50	33	48	24.5115	30.6605	44.4838
1	2	37	2	2	43.3	43.3	0	1	1	1	1	5	7	6	8	7	2	3	2	40	32	61	33.4121	40.6771	36.7597
1	2	37	3	1	40.8	40.8	0	1	1	2	2	10	10	10	10	10	8	6	9	73	37	59	29.5482	22.3708	28.7662
1	2	42	2	1	44.4	44.4	0	2	2	1	1	8	8	10	8	8	8	8	8	66	28	31	24.0019	20.0512	26.1136
1	2	32	3	1	38.9	38.9	0	1	1	2	1	7	4	9	3	6	7	8	4	48	28	36	28.0929	32.857	31.6071
1	2	51	2	3	38.8	38.8	0	1	1	1	2	3	6	9	2	1	3	8	5	37	33	47	30.8303	26.4858	54.7208
1	2	41	2	2	39.1	39.1	0	1	1	1	2	10	10	10	3	10	10	10	10	73	36	69	28.2236	46.9314	28.6721
1	2	26	3	2	43	43	0	1	1	1	2	5	3	4	2	5	5	5	2	31	28	42	38.2058	30.4931	40.2922
1	2	53	2	4	41.6	41.6	0	2	1	2	1	8	10	9	10	7	4	10	9	67	29	53	30.8078	56.8107	39.4968
1	2	38	2	3	41.4	41.4	0	1	1	1	2	10	8	9	9	9	8	9	10	72	36	76	28.4219	35.5019	22.4513
1	2	31	3	2	43.4	43.4	0	1	2	2	1	8	5	9	8	8	6	9	8	61	32	56	40.1978	49.5689	23.9773
1	2	44	3	2	45.9	45.9	0	1	2	1	1	2	2	2	3	2	1	1	1	14	30	51	31.0095	25.5798	25.7955
1	2	29	2	3	46.8	46.8	0	1	1	1	1	10	10	10	10	10	7	10	6	73	29	62	29.3169	27.3528	36.5162
1	1	62	1	3	50	50	0	2	1	1	1	0	0	0	2	0	0	0	0	2	28	28	26.2387	42.442	43.039
1	2	56	2	3	35.8	35.8	0	2	2	2	1	9	9	9	10	10	9	10	10	76	34	46	26.3682	48.8124	46.8929
1	2	40	1	1	39.4	39.4	0	1	1	1	2	8	5	10	8	5	10	8	10	64	29	52	39.5082	40.2486	22
1	2	38	3	2	45.3	45.3	0	1	1	2	1	7	7	6	5	5	6	8	9	53	32	47	32.1471	27.7873	30.6006
1	2	36	2	3	50.8	50.8	0	1	1	1	2	10	6	9	8	10	10	10	9	72	35	54	42.9801	52.8441	50.0909
1	2	27	3	2	39.5	39.5	0	1	1	1	1	10	5	10	2	10	10	6	7	60	28	46	29.7776	24.5011	28.8409
1	2	49	1	1	43.9	43.9	0	1	2	1	1	6	6	10	9	6	8	10	10	65	32	30	49.532	43.8284	19.4383
1	2	42	2	1	47.4	47.4	0	1	2	1	2	4	5	3	3	4	8	5	8	40	30	43	36.2255	31.7881	22.2727
1	2	23	2	3	42.2	42.2	0	1	2	1	1	7	8	7	9	7	5	7	7	57	35	43	31.3174	36.978	36.3896
1	2	20	2	1	42.1	42.1	0	1	1	1	2	10	10	10	8	10	8	10	10	76	36	78	36.8864	28.533	19.4416
1	1	51	1	3	40.6	40.6	0	1	1	1	2	7	5	10	5	4	5	6	9	51	29	37	33.7061	51.9068	41.1266
1	1	21	1	1	50	50	0	1	2	1	2	2	2	6	6	2	2	3	6	29	32	52	30.9098	23.8885	20.224
1	2	40	1	3	45.7	45.7	0	1	1	1	2	6	2	3	4	2	9	7	5	38	26	47	27.9879	20.7941	12.9091
1	1	42	2	3	37.3	37.3	0	1	1	2	1	2	9	2	8	1	7	5	8	42	29	24	32.8698	18.6432	17.5
1	2	43	1	3	45.4	45.4	0	1	1	1	1	2	3	2	4	4	6	6	8	35	33	78	31.3812	41.785	9.56494
1	1	51	2	3	40.3	40.3	0	1	2	1	2	5	7	8	8	5	7	6	8	54	29	54	37.1532	21.3787	11.9643
1	1	25	2	3	37.4	37.4	0	1	1	1	1	3	10	10	10	10	10	10	10	73	34	40	26.737	31.4379	28.6201
1	2	42	2	3	43.7	43.7	0	1	1	1	1	3	3	3	3	2	4	2	8	28	26	28	29.4239	36.0139	8.18182
1	2	35	3	1	42.1	42.1	0	1	1	2	2	0	3	2	1	0	9	8	10	33	35	66	28.1234	31.0566	5.12338
1	1	30	2	1	44.3	44.3	0	1	1	1	1	3	1	1	1	1	1	1	1	10	33	57	26.008	48.5843	11.7727
1	2	39	2	3	40.4	40.4	0	2	1	2	1	9	9	9	1	9	9	9	8	63	32	13	19.3183	30.0422	9.06818
2	2	42	2	2	42.7	26	-16.7	1	1	1	1	9	9	9	5	7	9	9	9	66	27	60	59.145	53.8123	98.6364
2	2	50	3	3	43.8	29.7	-14.1	1	2	1	1	10	10	10	10	10	10	10	10	80	30	64	57.2261	59.3654	99.0909
2	1	31	2	1	38.9	30.6	-8.3	1	1	1	1	9	8	9	7	10	8	10	10	71	33	60	58.8454	60.7095	91.1526
2	1	50	1	3	40.8	28.6	-12.2	1	1	1	1	8	3	8	3	8	3	8	5	46	25	27	59.27	56.9689	99.2857
2	2	33	2	3	37.4	20	-17.4	1	1	1	1	10	10	10	10	10	10	10	10	80	32	80	61.4103	60.8792	99.5455
2	2	41	1	3	41.3	32.8	-8.5	1	1	1	1	4	5	5	5	5	5	5	5	39	30	28	60.9586	51.5919	95.974
2	1	37	1	2	41.4	32.4	-9	1	1	2	1	9	8	7	8	8	7	9	10	66	19	36	58.8737	32.7765	95
2	2	57	2	3	42.7	27.6	-15.1	1	1	1	1	10	10	10	10	10	10	10	10	80	38	72	62.0261	61.0618	100
2	2	50	3	3	46.7	32.3	-14.4	1	1	1	1	10	9	9	9	9	9	10	10	75	30	68	60.2025	60.5342	93.8312
2	2	21	2	2	40.6	22.5	-18.1	1	1	2	2	7	8	10	7	10	10	9	10	71	36	66	42.1737	55.6236	97.1429
2	1	50	2	3	48.1	28.9	-19.2	1	2	1	1	10	9	10	9	9	10	10	10	77	34	69	61.887	63.4696	99.2857
2	2	61	2	3	43.1	24.2	-18.9	1	1	2	1	8	8	10	10	8	10	10	10	74	30	64	46.3298	45.3245	94.026
2	2	42	2	1	38.6	27.6	-11	1	1	2	1	10	4	5	5	5	8	9	10	56	30	30	50.7878	50.545	97.1429
2	1	52	2	1	51	35.6	-15.4	1	1	2	1	9	9	9	9	9	9	9	10	73	36	80	62.1056	64.0242	100
2	2	28	2	1	46.9	30	-16.9	1	1	1	1	9	9	9	9	9	9	9	9	72	38	54	61.4615	57.5308	100
2	2	43	3	1	45	25.2	-19.8	1	1	1	1	9	5	9	9	3	5	9	9	58	30	58	56.4253	59.5168	96.1364
2	2	57	2	4	44.5	32.4	-12.1	1	1	1	2	8	8	9	8	6	9	8	10	66	38	58	48.6064	56.4537	95.4545
2	1	23	2	1	53	29.8	-23.2	1	1	2	1	10	10	10	10	10	10	10	10	80	30	65	53.491	48.2841	93.1006
2	1	55	2	1	42.5	33.1	-9.4	2	2	1	1	3	8	9	5	3	9	9	9	55	34	41	55.5727	45.9201	91.2987
2	1	52	1	2	38.1	32.9	-5.2	1	1	1	2	10	10	10	10	10	10	10	10	80	40	84	41.6636	50.1115	97.2727
2	1	41	3	1	52.1	35	-17.1	1	1	1	1	7	7	9	8	5	9	9	9	63	40	73	61.887	63.4696	98.5714
2	2	37	3	1	33.9	21.8	-12.1	1	1	1	1	10	10	10	10	10	6	10	10	76	36	75	61.6288	61.4338	100
2	2	39	2	3	40.1	29	-11.1	1	1	1	1	10	10	10	10	10	9	10	10	79	35	75	55.1239	55.2394	93.3604
2	2	46	2	3	47.2	36	-11.2	1	1	1	1	8	10	8	10	8	8	8	10	70	33	78	52.5635	62.7342	97.6623
2	2	62	3	3	42	32.2	-9.8	1	1	1	2	10	10	10	10	10	10	10	10	80	36	59	38.2477	45.6464	92.8409
2	2	36	2	1	46	27	-19	1	1	1	1	10	10	10	10	10	10	10	10	80	30	36	52.4603	56.0574	98.6364
2	2	44	3	1	51.2	33.5	-17.7	1	2	1	1	10	8	10	10	10	5	8	7	68	39	76	59.9471	56.5513	90.8929
2	2	62	2	3	45	27.5	-17.5	1	2	1	1	8	8	8	10	8	8	8	10	68	29	54	60.3891	59.0273	97.4026
2	1	48	3	1	54.3	34.5	-19.8	1	2	1	1	10	10	10	10	10	10	10	10	80	34	58	59.1457	55.1693	99.5455
2	2	51	2	3	53.4	37.9	-15.5	1	1	1	2	10	6	10	6	10	10	5	10	67	34	37	59.2139	59.3021	93.7792
2	2	40	2	3	43.5	28.7	-14.8	1	1	1	1	9	7	10	9	9	9	8	10	71	30	42	56.2084	55.2184	100
2	2	57	4	2	44.6	29.6	-15	1	1	1	1	10	10	10	10	10	8	10	10	78	35	57	55.7329	57.1504	95
2	2	47	1	1	46.3	27.4	-18.9	1	1	1	1	8	6	8	8	8	8	8	8	62	31	65	51.9098	58.0401	99.0909
2	2	21	2	2	49.7	22.3	-27.4	1	1	2	1	10	10	10	10	10	10	10	10	80	40	84	62.1056	64.0242	100
2	1	56	3	3	42.6	27.9	-14.7	1	2	1	1	8	8	8	8	8	8	8	10	66	34	56	60.0413	44.7544	75.5195
2	2	43	2	2	38.7	29.6	-9.1	1	1	1	1	10	10	10	10	10	9	10	10	79	32	40	48.6809	55.2485	90.5844
2	2	43	2	3	43.3	29.5	-13.8	1	1	2	1	2	1	3	9	2	9	5	10	41	31	52	60.0821	50.8969	93.3929
2	1	41	3	3	42.4	28.9	-13.5	1	2	1	1	3	7	5	7	3	8	6	10	49	38	63	55.3318	55.6605	92.1429
2	1	36	1	3	44.3	32	-12.3	1	1	1	1	10	10	10	10	10	10	10	10	80	29	31	57.2286	54.4451	100
2	1	42	1	3	39.2	27.5	-11.7	1	1	1	1	9	3	3	4	5	8	5	5	42	29	30	61.5959	49.693	100
2	2	52	1	1	36.1	29.9	-6.2	2	2	1	1	9	8	10	10	9	10	9	10	75	33	68	61.8473	61.9884	99.2857
2	2	47	2	2	41.2	24.7	-16.5	1	1	1	1	9	9	9	9	10	5	10	10	71	37	76	58.8727	57.3409	98.5714
2	2	55	2	3	45.4	29.2	-16.2	1	1	2	2	9	8	9	9	9	10	10	10	74	28	59	55.2433	58.5358	98.5714
2	1	40	2	4	38.5	28.1	-10.4	1	1	1	1	10	10	10	10	10	10	10	10	80	37	54	45.2799	60.6927	99.5455
2	2	40	1	3	46.6	33	-13.6	1	1	1	1	8	8	9	8	8	8	8	10	67	34	63	61.0396	59.3243	96.4286
2	1	40	2	3	39	31.4	-7.6	1	1	1	1	9	7	10	7	9	9	10	10	71	33	66	53.9804	47.6134	96.039
2	1	49	2	3	37.6	27.9	-9.7	1	1	1	1	5	5	5	5	5	6	5	6	42	36	63	56.5552	47.4579	88.1818
2	1	60	2	4	43.7	25.7	-18	1	1	1	2	9	7	10	9	8	8	8	10	69	25	57	33.3776	43.1708	97.7273
2	2	45	2	3	42.8	27.9	-14.9	1	1	1	1	8	9	9	9	8	9	9	9	70	29	59	#NULL!	#NULL!	98.8312
2	2	41	3	3	48	33.6	-14.4	1	1	2	1	5	6	10	8	5	10	8	10	62	33	46	50.1804	49.3325	97.0455
2	2	45	2	3	40.8	29.2	-11.6	1	1	1	1	5	5	1	5	6	2	6	0	30	36	41	55.7146	52.7193	100
2	1	53	3	1	39.9	29.8	-10.1	1	2	1	1	7	6	8	8	6	6	8	8	57	29	65	54.4909	58.1004	90.9416
2	2	50	3	3	40.4	28.3	-12.1	1	1	2	1	5	5	5	10	5	3	8	10	51	40	78	55.4125	53.0721	96.8182
2	2	23	3	1	38.5	23.4	-15.1	1	1	2	1	7	6	10	9	7	9	9	9	66	31	60	55.3923	38.8648	96.4935
2	2	52	2	1	45	37.2	-7.8	1	2	1	1	10	10	10	10	10	10	10	10	80	30	65	59.0273	60.809	100
2	2	59	2	3	37.5	29.9	-7.6	1	2	1	1	10	10	9	9	9	10	10	9	76	35	73	60.3261	59.7094	97.8409
2	2	51	2	2	39.9	25.6	-14.3	1	2	1	2	9	9	10	10	10	9	10	10	77	29	73	46.8773	50.2202	92.1396
2	2	33	2	3	44.7	28.5	-16.2	1	1	1	1	10	10	10	10	10	10	10	10	80	39	66	57.8592	50.4203	90
2	2	39	2	2	39.6	25.7	-13.9	1	1	1	1	10	8	10	8	10	8	10	10	74	35	66	61.2315	61.8058	99.2857
2	2	30	2	3	38.8	22.9	-15.9	1	2	1	1	6	8	8	5	6	4	7	#NULL!	#NULL!	25	54	56.1314	48.8124	95.5195
2	2	39	2	4	49.3	31.3	-18	1	1	1	1	10	9	10	9	8	9	9	10	74	37	58	59.1707	60.858	95.5195
2	1	45	2	3	38.2	28.9	-9.3	2	2	1	1	10	9	9	9	9	8	9	10	73	40	48	55.1618	52.7403	99.2857
2	1	20	2	1	50.7	29.8	-20.9	1	1	1	1	10	4	2	6	5	3	9	10	49	34	34	57.9985	55.5082	90.2597
2	2	58	2	3	40.6	33	-7.6	1	1	1	1	8	5	9	7	9	5	9	10	62	33	54	42.9455	53.3139	84.6071
2	2	47	2	2	46	31.2	-14.8	1	1	1	1	10	8	8	10	10	8	10	10	74	36	25	44.9312	60.3353	87.4773
2	2	44	2	3	43.5	32.6	-10.9	1	1	1	1	10	10	10	10	10	8	10	10	78	39	70	58.9479	57.8466	93.789
2	1	47	2	3	38.6	27.1	-11.5	1	1	1	1	10	6	10	6	7	10	10	10	69	31	42	57.5595	40.0584	86.224
2	2	38	3	3	41	26.9	-14.1	1	1	1	1	6	3	4	4	4	10	8	10	49	27	66	60.2655	55.4004	81.9026
2	2	40	2	4	43.3	32.3	-11	1	1	1	1	4	4	7	5	4	5	8	8	45	29	55	45.5853	46.7435	76.8571
2	2	30	3	1	44.3	29.7	-14.6	1	1	1	1	10	2	8	4	3	4	9	7	47	32	64	52.1124	55.3586	89.1623
2	2	23	3	2	40.7	21.8	-18.9	1	1	1	1	9	9	10	7	7	9	10	10	71	35	66	56.8204	39.3817	90.7532
2	2	41	2	2	42.3	33.7	-8.6	1	1	1	1	4	5	5	6	4	7	6	8	45	27	67	52.7869	27.5789	72.0649
2	2	46	2	4	43.9	34.2	-9.7	1	1	2	1	4	4	6	6	2	5	8	8	43	25	45	53.3343	33.4862	64.3117
2	2	41	2	3	42.6	26.4	-16.2	1	1	1	1	9	9	9	9	8	9	8	9	70	28	60	43.3607	45.1097	85.8312
2	2	40	2	3	39.4	32.8	-6.6	1	1	1	1	7	9	9	9	7	9	7	10	67	29	53	60.2184	50.4362	69.0747
2	2	45	2	3	62	39.1	-22.9	1	2	2	1	10	8	10	10	10	8	10	10	76	38	76	49.5269	55.7593	96.2175
2	2	43	2	3	48.9	32.8	-16.1	1	1	1	1	10	10	10	10	10	10	10	10	80	31	71	59.4145	54.6778	68.2695
2	2	43	2	3	42	28.2	-13.8	1	1	1	1	10	8	10	8	8	10	8	8	70	34	84	59.9344	59.5841	87.6786
2	2	37	2	1	40.8	27.7	-13.1	1	1	1	2	10	10	10	10	10	10	10	10	80	30	45	32.766	27.9021	84.0422
2	2	30	3	3	47.6	29.9	-17.7	1	1	1	1	9	10	9	8	7	10	10	10	73	35	66	50.5891	56.5442	93.5552
2	1	27	2	1	45.3	32	-13.3	1	1	1	1	10	10	10	10	10	10	10	10	80	33	36	58.7188	59.8194	98.2955
2	1	25	1	1	47.5	34.6	-12.9	1	1	1	1	10	7	5	9	8	10	10	10	69	29	28	57.9916	54.6128	90.9253
2	1	43	2	1	41.9	32.2	-9.7	1	1	1	1	8	9	9	7	9	8	9	10	69	32	58	57.9897	60.641	92.474
2	2	40	3	3	42.4	27	-15.4	1	1	1	1	10	8	10	7	10	7	10	10	72	37	51	55.3325	54.2189	86.3214
2	2	62	2	1	39.3	28.7	-10.6	1	1	1	1	10	10	8	10	8	8	10	10	74	29	58	40.8234	46.6127	92.0227
2	2	33	2	1	51.1	33.2	-17.9	1	1	1	1	7	7	8	3	7	4	7	9	52	33	41	58.1502	57.5644	85.2338
2	2	57	2	1	38.9	30.2	-8.7	1	1	2	1	4	1	1	1	4	2	0	0	13	30	50	38.4346	56.6725	63.6039
2	1	58	2	3	37.5	32.7	-4.8	1	2	1	1	6	5	8	7	6	7	7	8	54	26	55	53.3974	54.2442	77.1818
2	2	41	3	3	38.2	34.1	-4.1	1	1	1	1	8	6	5	8	5	8	8	9	57	32	47	39.5043	45.1422	76.4805
2	2	41	2	1	46.3	28.8	-17.5	1	1	1	1	8	3	10	3	5	10	7	9	55	27	55	54.0781	53.2732	71.4675
2	2	62	1	3	42.6	31.9	-10.7	1	1	2	1	10	9	10	9	10	9	9	10	76	32	68	56.4651	60.998	87.0195
2	1	44	2	3	36.5	28.7	-7.8	1	1	1	1	10	5	6	8	4	3	4	4	44	33	52	40.6317	32.7679	84.3799
2	2	52	3	3	45.6	36.9	-8.7	1	2	1	1	7	8	8	8	7	8	7	9	62	32	61	58.4329	58.1788	70.461
2	1	23	2	1	49.7	34.4	-15.3	1	1	1	1	9	7	10	8	6	10	4	9	63	35	41	60.7423	57.9908	76.9058
2	2	53	2	3	45.5	26.6	-18.9	1	1	1	1	4	1	9	9	3	3	9	5	43	23	46	45.6639	47.6632	83.4578
2	2	43	2	1	58.7	38.2	-20.5	1	1	1	1	7	7	8	7	6	7	7	7	56	36	67	56.9402	57.7249	70.4058
2	2	41	2	3	42.7	29.9	-12.8	1	1	1	1	7	9	9	9	7	10	9	10	70	34	75	48.3209	50.2792	68.6396
2	1	45	4	2	46	28.6	-17.4	1	1	1	1	10	10	10	10	10	10	10	10	80	31	63	56.3958	42.0286	89.4935
2	2	43	2	3	40.6	25.2	-15.4	1	1	1	1	9	8	10	9	9	7	9	9	70	28	54	31.7966	46.158	80.3896
2	2	40	2	1	40	27.4	-12.6	1	1	1	1	6	6	7	6	4	7	7	9	52	18	54	54.5463	26.9217	76.0292
2	2	31	2	2	58.1	39.4	-18.7	1	1	1	1	8	6	8	8	8	8	8	10	64	30	41	54.0802	52.5395	74.0909
2	2	44	1	3	46.4	32.2	-14.2	1	1	1	1	8	8	8	8	8	8	8	8	64	32	84	43.5495	40.1962	85
2	2	62	1	1	38.5	30.4	-8.1	1	1	1	1	8	5	8	7	8	6	8	9	59	20	48	49.9262	26.9112	78.4221
2	2	33	3	1	54.6	39.5	-15.1	1	1	1	1	9	8	10	10	10	10	10	10	77	30	54	48.2517	45.1972	76.0812
2	2	24	2	1	42	23.9	-18.1	1	1	1	1	8	8	10	8	8	8	8	8	66	27	49	60.2302	53.1024	75.474
2	2	27	1	3	50	37.2	-12.8	1	1	2	1	10	10	10	10	10	10	10	10	80	30	40	53.3363	53.7073	67.4513
2	2	41	3	3	48	34	-14	1	1	1	1	7	7	9	8	4	8	6	8	57	29	56	48.0565	43.1137	66.4643
2	2	24	2	1	42.6	31.5	-11.1	1	1	1	1	9	10	10	10	9	10	10	10	78	30	45	55.181	49.5318	54.6786
2	1	54	3	1	46	31.8	-14.2	2	2	1	1	3	3	5	5	4	6	6	6	38	31	40	39.9599	29.9289	57.711
2	2	43	1	1	45.4	24.8	-20.6	1	1	1	1	10	10	10	10	10	10	10	10	80	30	49	37.7038	50.0193	63.0422
2	1	48	2	3	37.6	29.5	-8.1	2	2	2	1	8	8	10	7	7	8	10	10	68	23	31	26.0336	18.241	34.237
